# Supplementary material for: Evidence for a Common Origin of Homomorphic and Heteromorphic Sex Chromosomes in Distinct Spinacia Species
Source: PubMed Central journal article supplement (PMC4528323; doi:10.1534/g3.115.018671), 2015-06-05
Supplement: supp_g3.115.018671_FigureS1.pdf [file supp_g3.115.018671_FigureS1.pdf]

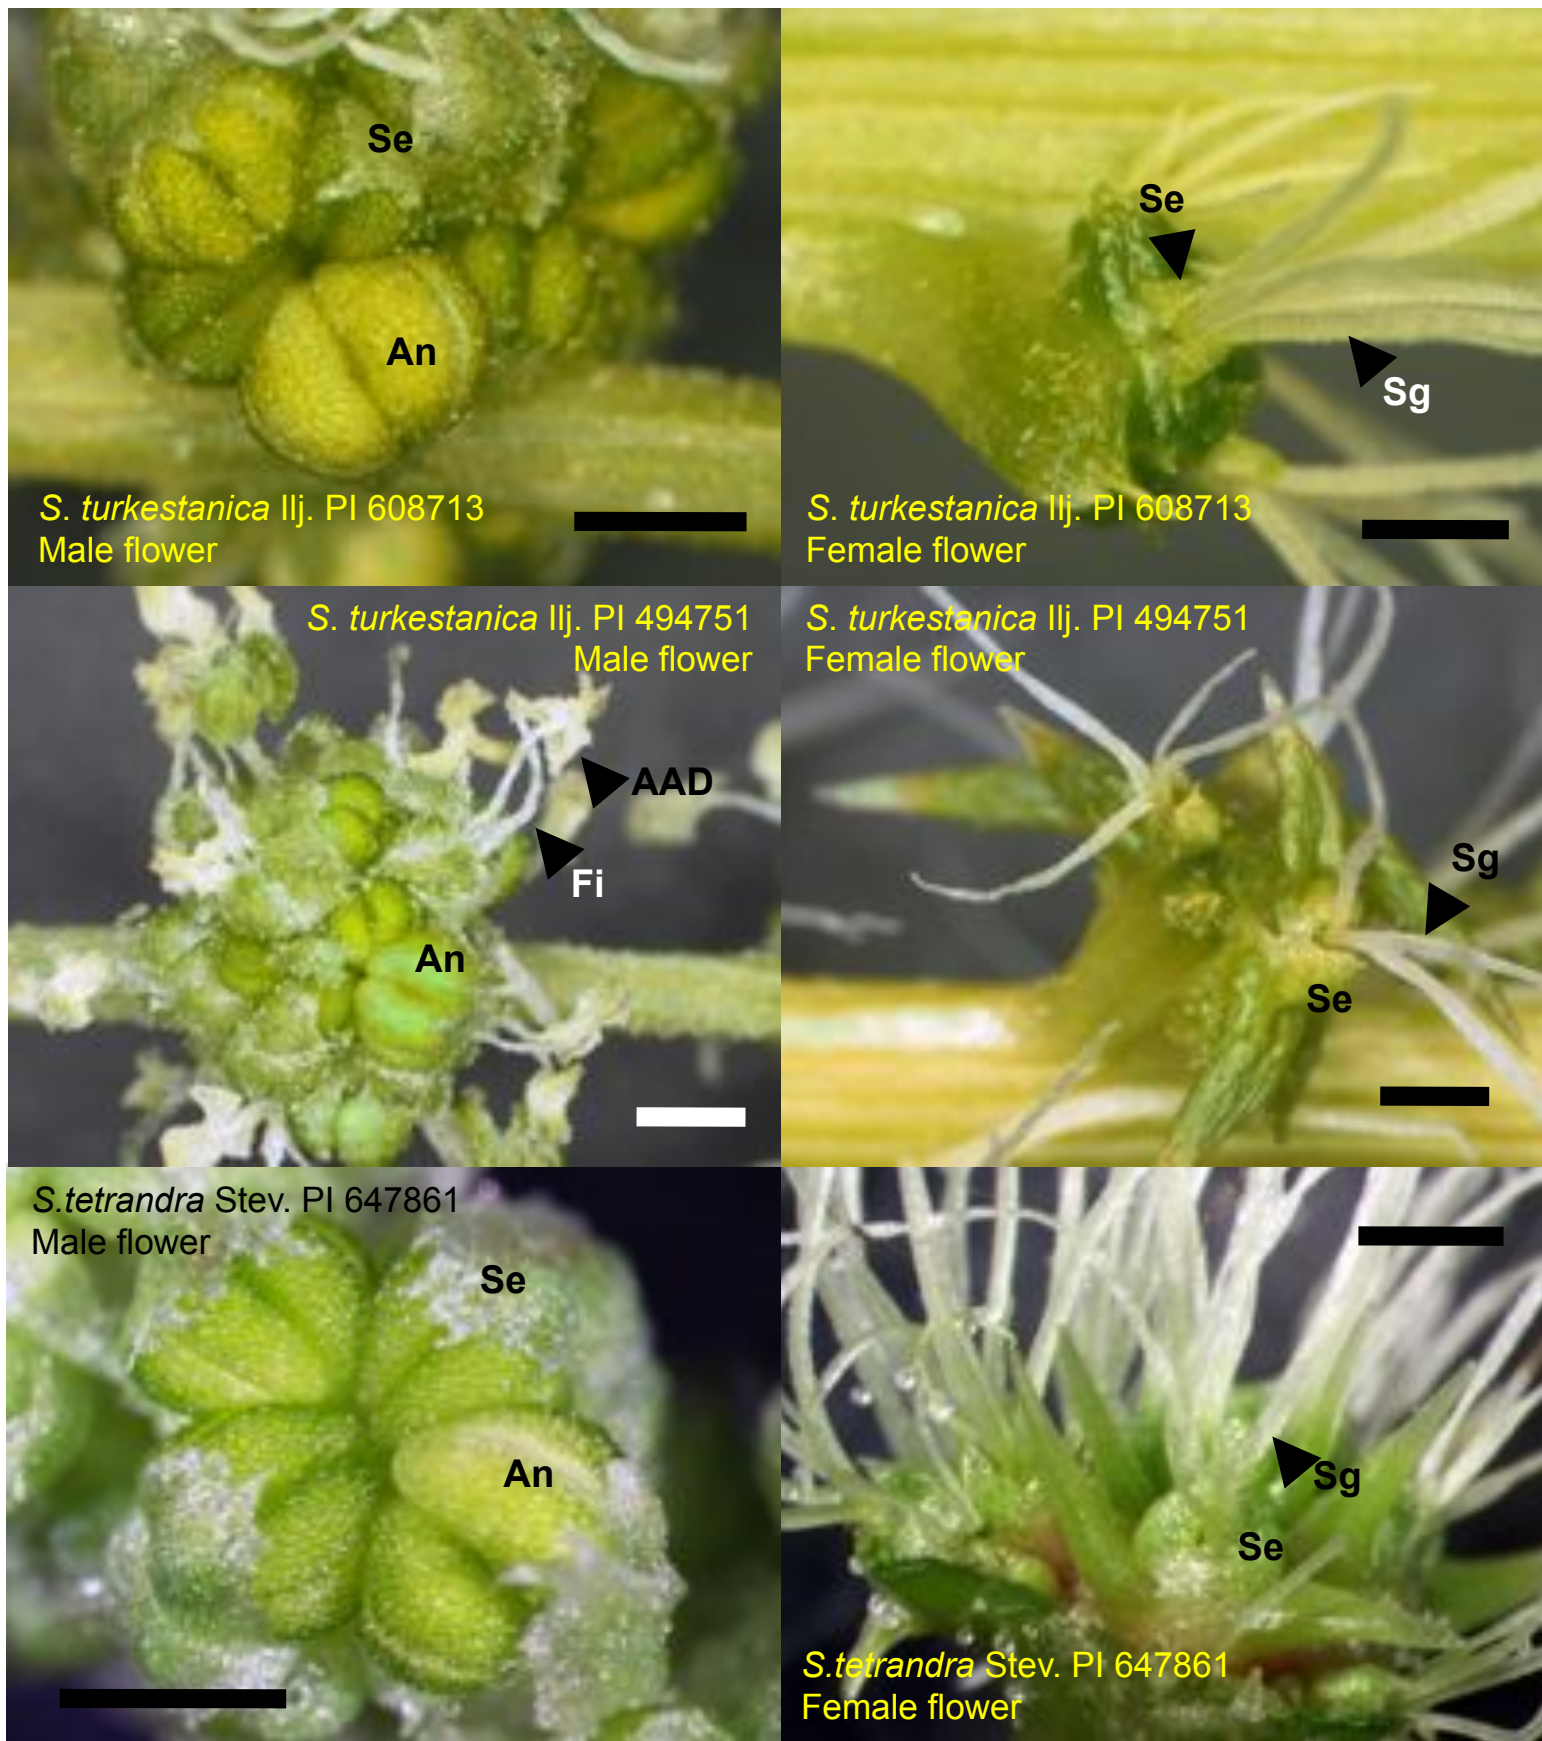

**Figure S1. Floral morphology of *S. turkestanica* Ilj. and *S. tetrandra* Stev.** Se, sepal; An, anther; AAD, anther after dehiscence; Fi, filament; Sg, stigma. Bar = 1.0 mm
