# Supplementary material for: Evidence for a Common Origin of Homomorphic and Heteromorphic Sex Chromosomes in Distinct Spinacia Species
Source: PubMed Central journal article supplement (PMC4528323; doi:10.1534/g3.115.018671), 2015-06-05
Supplement: supp_g3.115.018671_FigureS3.pdf [file supp_g3.115.018671_FigureS3.pdf]

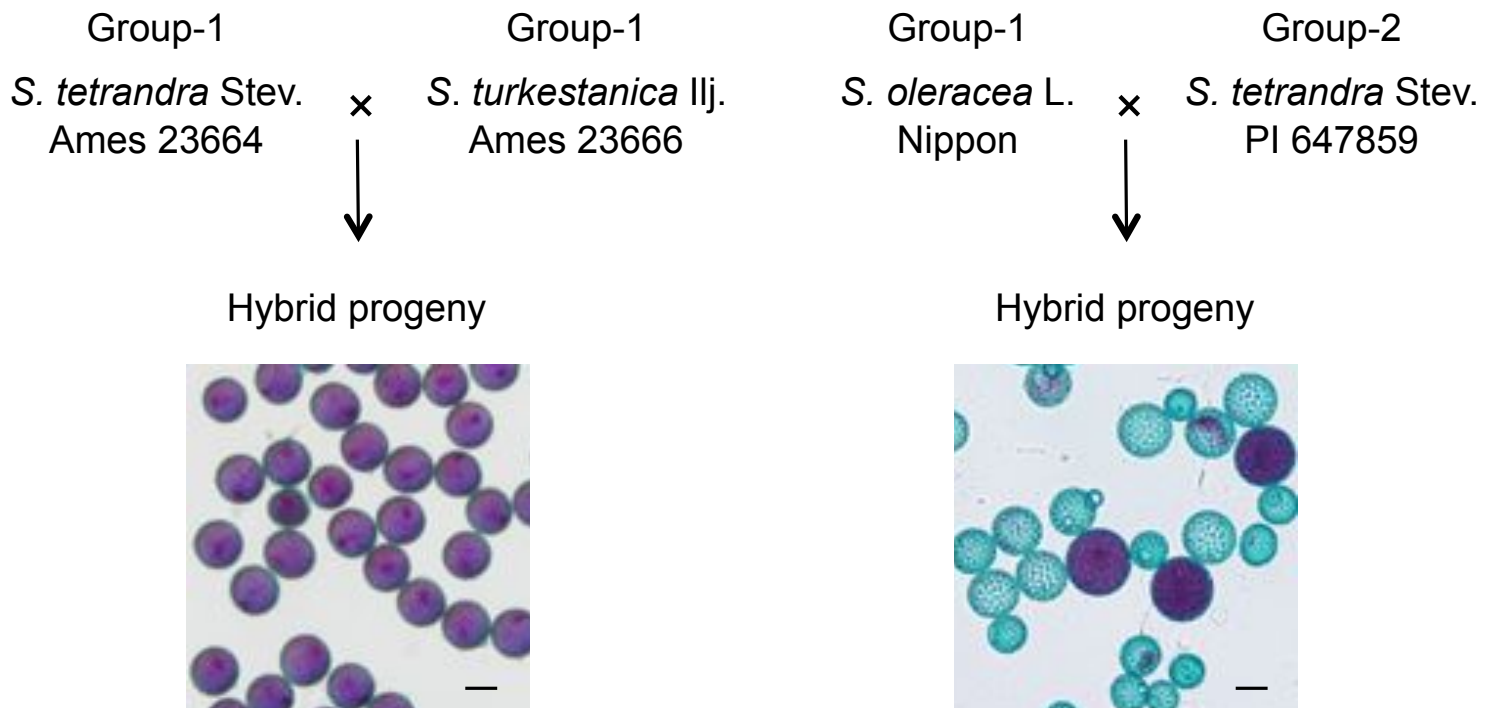

**Figure S3. Pollen fertility of interspecific hybrids between *Spinacia* species.** Pollen grains were stained with Alexander solution. Viable and non-viable pollen grains stained purple and pale-blue-green, respectively. Bars = 20 µm.
