# Supplementary material for: Evidence for a Common Origin of Homomorphic and Heteromorphic Sex Chromosomes in Distinct Spinacia Species
Source: PubMed Central journal article supplement (PMC4528323; doi:10.1534/g3.115.018671), 2015-06-05
Supplement: supp_g3.115.018671_FigureS5.pdf [file supp_g3.115.018671_FigureS5.pdf]

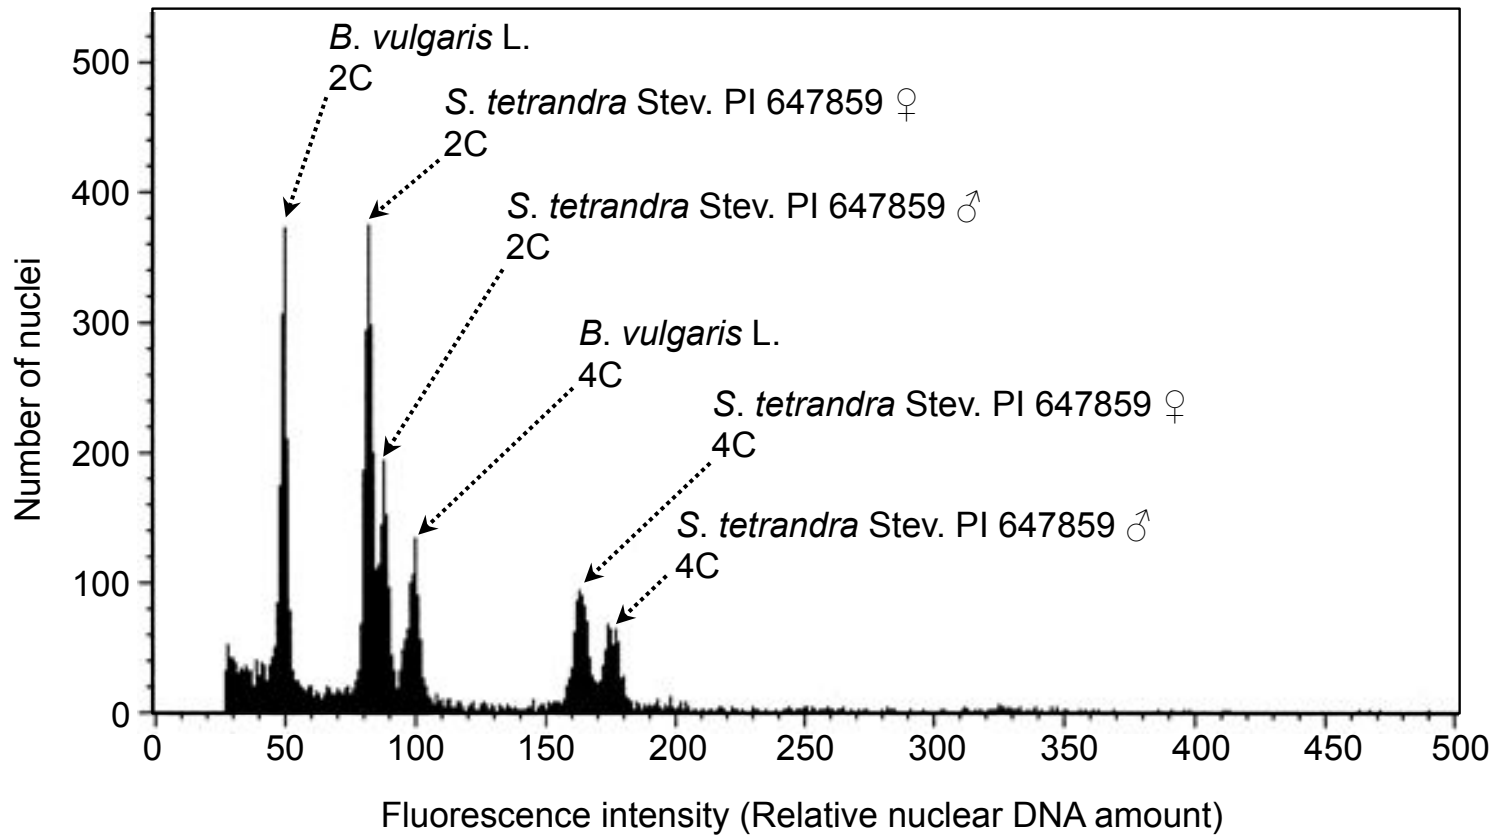

Figure S5. A histogram showing the nuclear DNA amount in a single plant of *B. vulgaris* L. TK81-MS, and a single male and female of *S. tetrandra* Stev. PI 647859. Arrows indicate 2C peaks (G0/G1 phase) and 4C peaks (G2/M phase).
