# Supplementary material for: Evidence for a Common Origin of Homomorphic and Heteromorphic Sex Chromosomes in Distinct Spinacia Species
Source: PubMed Central journal article supplement (PMC4528323; doi:10.1534/g3.115.018671), 2015-06-05
Supplement: supp_g3.115.018671_TableS2.pdf [file supp_g3.115.018671_TableS2.pdf]

**Table S2. Nucleotide sequences used for the phylogenetic analysis**

| Species                         | Accession, cultivar<br>or line    | Sequence ID No.  |                   |                  |                   |                  |           |
|---------------------------------|-----------------------------------|------------------|-------------------|------------------|-------------------|------------------|-----------|
|                                 |                                   | <i>trnL-trnF</i> | <i>rpl32-trnL</i> | <i>trnV-ndhC</i> | <i>ndhF-rpl32</i> | <i>psbD-trnT</i> | ITS       |
| <i>Spinacia oleracea</i> L.     | Ames 26244                        | AB935637*        | AB935607*         | LC009789*        | LC009819*         | LC009849*        | AB935664* |
|                                 | PI 173124                         | AB935638*        | AB935608*         | LC009790*        | LC009820*         | LC009850*        | AB935665* |
|                                 | PI 173972                         | AB935639*        | AB935609*         | LC009791*        | LC009821*         | LC009851*        | AB935666* |
|                                 | PI 181923                         | AB935640*        | AB935610*         | LC009792*        | LC009822*         | LC009852*        | AB935667* |
|                                 | PI 217425                         | AB935641*        | AB935611*         | LC009793*        | LC009823*         | LC009853*        | AB935668* |
|                                 | PI 604787                         | AB935642*        | AB935612*         | LC009794*        | LC009824*         | LC009854*        | AB935669* |
|                                 | PI 606707                         | AB935643*        | AB935613*         | LC009795*        | LC009825*         | LC009855*        | AB935670* |
|                                 | JP 25756                          | AB935644*        | AB935614*         | LC009796*        | LC009826*         | LC009856*        | AB935671* |
|                                 | JP 25763                          | AB935645*        | AB935615*         | LC009797*        | LC009827*         | LC009857*        | AB935672* |
|                                 | Mazeran                           | AB935646*        | AB935616*         | LC009798*        | LC009828*         | LC009858*        | AB935673* |
|                                 | Nippon                            | AB935647*        | AB935617*         | LC009799*        | LC009829*         | LC009859*        | AB935674* |
|                                 | SPI 588                           | AB935648*        | AB935618*         | LC009800*        | LC009830*         | LC009860*        | AB935675* |
|                                 | 03-009                            | AB935649*        | AB935619*         | LC009801*        | LC009831*         | LC009861*        | AB935676* |
|                                 | 86-36                             | AB935650*        | AB935620*         | LC009802*        | LC009832*         | LC009862*        | AB935677* |
|                                 | 105-18                            | AB935651*        | AB935621*         | LC009803*        | LC009833*         | LC009863*        | AB935678* |
|                                 | <i>Spinacia turkestanica</i> Ilj. | Ames 23666       | HE577483          | AB935622*        | LC009804*         | LC009834*        | LC009864* |
| PI 494751                       |                                   | AB935652*        | AB935623*         | LC009805*        | LC009835*         | LC009865*        | AB935679* |
| PI 647863                       |                                   | AB935653*        | AB935624*         | LC009806*        | LC009836*         | LC009866*        | AB935680* |
| PI 604792                       |                                   | AB935654*        | AB935625*         | LC009807*        | LC009837*         | LC009867*        | AB935681* |
| PI 608713                       |                                   | AB935655*        | AB935626*         | LC009808*        | LC009838*         | LC009868*        | AB935682* |
| CGN 09594                       |                                   | AB935656*        | AB935627*         | LC009809*        | LC009839*         | LC009869*        | AB935683* |
| CGN 09597                       |                                   | AB935657*        | AB935628*         | LC009810*        | LC009840*         | LC009870*        | AB935684* |
| <i>Spinacia tetrandra</i> Stev. | Ames 23664                        | HE577482         | AB935629*         | LC009811*        | LC009841*         | LC009871*        | HE577345  |
|                                 | PI 608712                         | AB935658*        | AB935630*         | LC009812*        | LC009842*         | LC009872*        | AB935685* |
|                                 | PI 647859                         | AB935659*        | AB935631*         | LC009813*        | LC009843*         | LC009873*        | AB935686* |
|                                 | PI 647860                         | AB935660*        | AB935632*         | LC009814*        | LC009844*         | LC009874*        | AB935687* |
|                                 | PI 647861                         | AB935661*        | AB935633*         | LC009815*        | LC009845*         | LC009875*        | AB935688* |
| <i>Beta procumbens</i> Chr.     |                                   |                  |                   |                  |                   |                  |           |
| Sm.                             | sp541205-03                       | AB935663*        | AB935636*         | LC009816*        | LC009846*         | LC009876*        | AB935691* |
| <i>Beta vulgaris</i> L.         |                                   | HE577473         | EF534108.1        | EF534108.1       | EF534108.1        | EF534108.1       | HE577334  |
| <i>Beta webbiana</i> Moq.       | Ames 4515                         | AB935662*        | AB935634*         | LC009818*        | LC009848*         | LC009878*        | AB935689* |

\* Nucleotide sequences determined in the present study.
