# Supplementary material for: Evidence for a Common Origin of Homomorphic and Heteromorphic Sex Chromosomes in Distinct Spinacia Species
Source: PubMed Central journal article supplement (PMC4528323; doi:10.1534/g3.115.018671), 2015-06-05
Supplement: supp_g3.115.018671_TableS8.pdf [file supp_g3.115.018671_TableS8.pdf]

**Table S8. Single nucleotide polymorphism typing for the *keto*hexokinase (*khk*) locus in progeny plants from the cross between a male and a female plant in PI 647859, using dCAPS marker SP\_0048**

| Progeny plants | SNP Genotypes |    | Total |
|----------------|---------------|----|-------|
|                | TT            | TA |       |
| Male           | 10            | 0  | 10    |
| Female         | 0             | 23 | 23    |
| Total          | 10            | 23 | 33    |
